# Supplementary material
Source: PubMed Central journal article supplement (PMC5880282)
Supplement: NIHMS951226-supplement-002157_-_Supplemental_Material.pdf [file NIHMS951226-supplement-002157_-_Supplemental_Material.pdf]

## SUPPLEMENTAL MATERIAL

**Supplement Table 1.** Correlation between baseline circulating BCAA metabolites and cardiometabolic biomarkers in WHS.

|                      | <b>BCAA</b> | <b>Isoleucine</b> | <b>Leucine</b> | <b>Valine</b>  | <b>Hba1c%</b>  | <b>LPIR</b>    | <b>Triglycerides</b> | <b>LDL-C</b>   | <b>GlycA</b>   |
|----------------------|-------------|-------------------|----------------|----------------|----------------|----------------|----------------------|----------------|----------------|
| <b>BCAA</b>          | 1           | 0.74<br><.0001    | 0.86<br><.0001 | 0.93<br><.0001 | 0.23<br><.0001 | 0.31<br><.0001 | 0.28<br><.0001       | 0.11<br><.0001 | 0.30<br><.0001 |
| <b>Isoleucine</b>    |             | 1                 | 0.51<br><.0001 | 0.60<br><.0001 | 0.18<br><.0001 | 0.31<br><.0001 | 0.28<br><.0001       | 0.07<br><.0001 | 0.20<br><.0001 |
| <b>Leucine</b>       |             |                   | 1              | 0.68<br><.0001 | 0.16<br><.0001 | 0.18<br><.0001 | 0.14<br><.0001       | 0.12<br><.0001 | 0.26<br><.0001 |
| <b>Valine</b>        |             |                   |                | 1              | 0.24<br><.0001 | 0.32<br><.0001 | 0.30<br><.0001       | 0.09<br><.0001 | 0.27<br><.0001 |
| <b>Hba1c%</b>        |             |                   |                |                | 1              | 0.17<br><.0001 | 0.18<br><.0001       | 0.11<br><.0001 | 0.20<br><.0001 |
| <b>LPIR</b>          |             |                   |                |                |                | 1              | 0.71<br><.0001       | 0.13<br><.0001 | 0.46<br><.0001 |
| <b>Triglycerides</b> |             |                   |                |                |                |                | 1                    | 0.29<br><.0001 | 0.46<br><.0001 |
| <b>LDL-C</b>         |             |                   |                |                |                |                |                      | 1              | 0.17<br><.0001 |

Metabolite values are ln-transformed and standardized; other biomarkers are ln-transformed for analysis.

BCAAs=branched-chain amino acids, Hba1c=glycated haemoglobin, LPIR score=lipoprotein insulin resistance score that reflects lipoprotein derangements of insulin resistance, LDL-C=low density lipoprotein cholesterol, GlycA=glycoprotein N-acetyl methyl groups

**Supplement Table 2.** Prospective association between baseline circulating total BCAAs in relation to incident total cardiovascular disease, MI, stroke, and revascularization risk in 27,401 US women, with further adjustment for individual ln-transformed biomarkers of CVD risk.

|                                                   | <b>Total CVD</b>         |
|---------------------------------------------------|--------------------------|
|                                                   | HR per SD                |
|                                                   | (95% CI)                 |
| <b>Model 3*</b>                                   |                          |
| <b>Total BCAAs</b>                                | <b>1.13 (1.08, 1.18)</b> |
| + Hba1c%                                          | 1.07 (1.02, 1.12)        |
| + triglycerides                                   | 1.09 (1.04, 1.14)        |
| + LPIR Score                                      | 1.10 (1.05, 1.15)        |
| + GlycA                                           | 1.10 (1.05, 1.15)        |
| + hsCRP                                           | 1.11 (1.06, 1.16)        |
| + LDL cholesterol                                 | 1.12 (1.08, 1.18)        |
| + HDL cholesterol                                 | 1.12 (1.08, 1.18)        |
| + Hba1c%, triglycerides,<br>LPIR Score, and GlycA | 1.02 (0.98, 1.07)        |

\*Multivariable adjusted model 3 includes the following: age (continuous), randomized treatment assignments (ASA, BC, VE), fasting status at blood draw, menopausal status (pre, post, uncertain, missing), current hormone therapy use, family history of MI, Caucasian race/ethnicity, smoking status (never, past, current <15 c/d, current 15+ c/d), AHEI diet quality score (quintiles), alcohol intake (4 categories), total physical activity MET-hrs/wk (quintiles), history of high cholesterol, history of hypertension, and BMI (10 categories), plus the biomarkers as indicated above.

BCAAs=branched-chain amino acids, Hba1c=glycated haemoglobin, LPIR score=lipoprotein insulin resistance score that reflects lipoprotein derangements of insulin resistance, GlycA=glycoprotein N-acetyl methyl groups, hsCRP=high sensitivity C-reactive protein, LDL-C=low density lipoprotein cholesterol, HR=hazard ratio, CI=confidence interval, SD=standard deviation

**Supplement Table 3.** Cox proportional hazards regression models of quintiles of baseline circulating BCAAs in relation to incident total cardiovascular disease (MI, stroke, revascularization) risk in 27,401 US women.

|                         | Q1    | Q2                | Q3                | Q4                | Q5                |              |
|-------------------------|-------|-------------------|-------------------|-------------------|-------------------|--------------|
|                         |       | HR (95% CI)       | HR (95% CI)       | HR (95% CI)       | HR (95% CI)       | p for trend* |
| <b>Total BCAAs</b>      |       |                   |                   |                   |                   |              |
| CVD Events              | 358   | 395               | 421               | 454               | 579               |              |
| Model 1: Age, treatment | [ref] | 1.07 (0.93, 1.24) | 1.09 (0.95, 1.26) | 1.24 (1.08, 1.42) | 1.67 (1.47, 1.91) | <0.0001      |
| Model 2: Multivariable  | [ref] | 1.07 (0.93, 1.24) | 1.06 (0.92, 1.22) | 1.13 (0.99, 1.30) | 1.43 (1.25, 1.64) | <0.0001      |
| Model 3: + BMI          | [ref] | 1.05 (0.91, 1.21) | 1.01 (0.88, 1.17) | 1.06 (0.92, 1.23) | 1.31 (1.14, 1.50) | 0.0001       |
| <b>Isoleucine</b>       |       |                   |                   |                   |                   |              |
| CVD Events              | 400   | 352               | 415               | 449               | 591               |              |
| Model 1: Age, treatment | [ref] | 0.99 (0.85, 1.14) | 1.02 (0.89, 1.17) | 1.16 (1.01, 1.33) | 1.74 (1.53, 1.98) | <0.0001      |
| Model 2: Multivariable  | [ref] | 0.95 (0.83, 1.10) | 0.97 (0.84, 1.11) | 1.06 (0.93, 1.22) | 1.47 (1.29, 1.67) | <0.0001      |
| Model 3: + BMI          | [ref] | 0.95 (0.82, 1.09) | 0.94 (0.82, 1.08) | 1.02 (0.89, 1.17) | 1.37 (1.20, 1.57) | <0.0001      |
| <b>Leucine</b>          |       |                   |                   |                   |                   |              |
| CVD Events              | 399   | 417               | 444               | 403               | 544               |              |
| Model 1: Age, treatment | [ref] | 1.09 (0.95, 1.25) | 1.10 (0.96, 1.26) | 1.09 (0.95, 1.25) | 1.43 (1.26, 1.63) | <0.0001      |
| Model 2: Multivariable  | [ref] | 1.10 (0.96, 1.26) | 1.08 (0.94, 1.23) | 1.03 (0.90, 1.18) | 1.26 (1.10, 1.43) | 0.003        |
| Model 3: + BMI          | [ref] | 1.09 (0.95, 1.25) | 1.05 (0.92, 1.21) | 0.98 (0.86, 1.13) | 1.18 (1.03, 1.34) | 0.07         |

**Valine**

| CVD Events              | 357   | 387               | 440               | 454               | 569               |         |
|-------------------------|-------|-------------------|-------------------|-------------------|-------------------|---------|
| Model 1: Age, treatment | [ref] | 1.07 (0.92, 1.23) | 1.17 (1.01, 1.34) | 1.28 (1.11, 1.47) | 1.62 (1.42, 1.85) | <0.0001 |
| Model 2: Multivariable  | [ref] | 1.08 (0.93, 1.25) | 1.13 (0.99, 1.30) | 1.19 (1.03, 1.36) | 1.42 (1.24, 1.63) | <0.0001 |
| Model 3: + BMI          | [ref] | 1.05 (0.91, 1.22) | 1.08 (0.94, 1.25) | 1.11 (0.96, 1.28) | 1.29 (1.12, 1.49) | 0.0002  |

---

BCAAs=branched chain amino acids, BMI=body mass index, Q=quintile, HR=hazard ratio, CI=confidence interval

Model 2 includes the following: age (continuous), randomized treatment assignments, fasting status at blood draw, menopausal status (pre, post, uncertain, missing), current hormone therapy use, family history of MI, Caucasian race/ethnicity, smoking status (never, past, current <15 c/d, current 15+ c/d), AHEI diet quality score (quintiles), alcohol intake (4 categories), total physical activity MET-hrs/wk (quintiles), history of high cholesterol, history of hypertension; Model 3 includes the covariates adjusted for in Model 2 plus BMI (adjusted for in 10 categories).

\*P-values for tests for trend were estimated by modeling the median values across quintiles as a continuous variable.

**Supplement Table 4.** Prospective association between baseline circulating total BCAAs (continuous, per SD) in relation to incident total cardiovascular disease, MI, stroke, and revascularization risk in 27,401 US women, stratified by risk factors at time of baseline blood draw.

|                                    |          | <b>Total CVD</b>  |
|------------------------------------|----------|-------------------|
|                                    |          | HR per SD*        |
| <b>Total BCAAs</b>                 | N events | (95% CI)          |
| <b>BMI, kg/m<sup>2</sup></b>       |          |                   |
| <25                                | 920      | 1.08 (1.01, 1.16) |
| ≥25                                | 1,227    | 1.15 (1.09, 1.22) |
| <i>P</i> -interaction              |          | 0.14              |
| <b>Menopausal status</b>           |          |                   |
| Pre                                | 668      | 1.13 (1.04, 1.23) |
| Post                               | 1,539    | 1.12 (1.07, 1.19) |
| <i>P</i> -interaction              |          | 0.32              |
| <b>Current hormone therapy use</b> |          |                   |
| No                                 | 1,222    | 1.15 (1.08, 1.22) |
| Yes                                | 985      | 1.11 (1.03, 1.18) |
| <i>P</i> -interaction              |          | 0.19              |
| <b>Metabolic syndrome</b>          |          |                   |
| No                                 | 1,251    | 1.07 (1.01, 1.14) |
| Yes                                | 902      | 1.12 (1.05, 1.20) |
| <i>P</i> -interaction              |          | 0.14              |
| <b>Baseline HbA1c</b>              |          |                   |
| <5.7%                              | 1,836    | 1.08 (1.02, 1.13) |
| ≥5.7%                              | 359      | 1.17 (1.06, 1.30) |
| <i>P</i> -interaction              |          | 0.023             |

**Fasting at blood draw**

|                      |       |                   |
|----------------------|-------|-------------------|
| No                   | 471   | 1.11 (1.02, 1.20) |
| Yes                  | 1,611 | 1.14 (1.07, 1.20) |
| <i>P-interaction</i> |       | 0.70              |

**Follow-up time, years**

|                      |       |                   |
|----------------------|-------|-------------------|
| <10                  | 951   | 1.18 (1.10, 1.26) |
| ≥10                  | 1,056 | 1.11 (1.04, 1.18) |
| <i>P-interaction</i> |       | 0.24              |

---

BCAAs=branched-chain amino acids, HR=hazard ratio, CI=confidence interval, SD=standard deviation  
\*Multivariable adjusted model includes the following: age (continuous), randomized treatment assignments (ASA, BC, VE), fasting status at blood draw, menopausal status (pre, post, uncertain, missing), current hormone therapy use, family history of MI, Caucasian race/ethnicity, smoking status (never, past, current <15 c/d, current 15+ c/d), AHEI diet quality score (quintiles), alcohol intake (4 categories), total physical activity MET-hrs/wk (quintiles), history of high cholesterol, history of hypertension, and BMI (10 categories).
